# Supplementary material
Source: PubMed Central journal article supplement (PMC3518041)
Supplement: NIHMS241096-supplement-Supplement.pdf [file NIHMS241096-supplement-Supplement.pdf]

## SUPPLEMENTARY INFORMATION

Supplementary Table 1 | SaPIbov1 complementation analysis.

| Strain | Phage            | Plasmid expressing           | No CdCl <sub>2</sub>        |                          | 5 μM CdCl <sub>2</sub>      |                          |
|--------|------------------|------------------------------|-----------------------------|--------------------------|-----------------------------|--------------------------|
|        |                  |                              | SaPIbov1 titre <sup>a</sup> | Phage titre <sup>b</sup> | SaPIbov1 titre <sup>a</sup> | Phage titre <sup>b</sup> |
| JP1794 | φ11              | -                            | 2.0 × 10 <sup>7</sup>       | 6.4 × 10 <sup>7</sup>    | 1.0 × 10 <sup>7</sup>       | 6.6 × 10 <sup>6</sup>    |
| JP4125 | φ11 Δ <i>dut</i> | -                            | 200                         | 1.1 × 10 <sup>9</sup>    | 120                         | 1.4 × 10 <sup>9</sup>    |
| JP6789 | φ11 Δ <i>dut</i> | <i>dut</i> φ11               | 2.4 × 10 <sup>6</sup>       | 5.1 × 10 <sup>7</sup>    | 3.4 × 10 <sup>7</sup>       | 1.4 × 10 <sup>7</sup>    |
| JP6790 | φ11 Δ <i>dut</i> | <i>dut</i> φ11 D81A          | 1.2 × 10 <sup>7</sup>       | 8.2 × 10 <sup>7</sup>    | 5.6 × 10 <sup>7</sup>       | 9.5 × 10 <sup>6</sup>    |
| JP6797 | φ11 Δ <i>dut</i> | <i>dut</i> 80α               | 550                         | 1.7 × 10 <sup>8</sup>    | 2.3 × 10 <sup>7</sup>       | 5.6 × 10 <sup>8</sup>    |
| JP6791 | φ11 Δ <i>dut</i> | <i>dut</i> PH15              | 230                         | 4.0 × 10 <sup>8</sup>    | 110                         | 1.9 × 10 <sup>9</sup>    |
| JP6796 | φ11 Δ <i>dut</i> | <i>dut</i> φ11 <sup>fs</sup> | 300                         | 1.6 × 10 <sup>9</sup>    | 70                          | 2.3 × 10 <sup>9</sup>    |
| JP6794 | φ11 Δ <i>dut</i> | <i>dut</i> 80α K8R, K12E     | 110                         | 9.1 × 10 <sup>8</sup>    | 2.2 × 10 <sup>7</sup>       | 4.9 × 10 <sup>8</sup>    |
| JP6800 | φ11 Δ <i>dut</i> | <i>dut</i> 80α K12E          | 70                          | 2.9 × 10 <sup>9</sup>    | 2.1 × 10 <sup>7</sup>       | 8.9 × 10 <sup>8</sup>    |
| JP6793 | φ11 Δ <i>dut</i> | <i>dut</i> 80α K8R           | 140                         | 9.0 × 10 <sup>8</sup>    | 2.4 × 10 <sup>7</sup>       | 8.2 × 10 <sup>8</sup>    |
| JP6795 | φ11 Δ <i>dut</i> | <i>dut</i> φ11 R8K, E12K     | 1.3 × 10 <sup>6</sup>       | 1.0 × 10 <sup>7</sup>    | 4.5 × 10 <sup>7</sup>       | 6.5 × 10 <sup>6</sup>    |
| JP6798 | φ11 Δ <i>dut</i> | <i>dut</i> φ11 R8K           | 2.0 × 10 <sup>6</sup>       | 3.3 × 10 <sup>7</sup>    | 3.3 × 10 <sup>7</sup>       | 6.7 × 10 <sup>6</sup>    |
| JP6799 | φ11 Δ <i>dut</i> | <i>dut</i> φ11 E12K          | 1.9 × 10 <sup>6</sup>       | 8.1 × 10 <sup>7</sup>    | 7.4 × 10 <sup>7</sup>       | 1.3 × 10 <sup>6</sup>    |
| JP3603 | 80α              | -                            | 4.0 × 10 <sup>7</sup>       | 3.1 × 10 <sup>8</sup>    | 3.5 × 10 <sup>7</sup>       | 1.9 × 10 <sup>8</sup>    |
| JP6132 | 80α Δ <i>dut</i> | -                            | 140                         | 5.2 × 10 <sup>10</sup>   | 120                         | 8.2 × 10 <sup>9</sup>    |
| JP6881 | 80α Δ <i>dut</i> | <i>dut</i> 80α               | 520                         | 4.8 × 10 <sup>10</sup>   | 1.8 × 10 <sup>7</sup>       | 1.3 × 10 <sup>8</sup>    |
| JP6879 | 80α Δ <i>dut</i> | <i>dut</i> 80α D95E          | 220                         | 2.1 × 10 <sup>10</sup>   | 180                         | 1.3 × 10 <sup>10</sup>   |

<sup>a</sup>No. transductants x ml of induced culture, using RN4220 as recipient strain.

<sup>b</sup>No. plaques x ml of induced culture, using RN4220 as recipient strain.

Supplementary Table 2 | SaPIbov2 complementation analysis.

| Strain | Prophage                   | Plasmid           | Induction <sup>a</sup> | SaPIbov2 titre <sup>b</sup> |
|--------|----------------------------|-------------------|------------------------|-----------------------------|
| JP6764 | 80 $\alpha$                | -                 |                        | 1.7 x 10 <sup>7</sup>       |
| JP6215 | 80 $\alpha$ $\Delta$ ORF15 | -                 |                        | 5.4 x 10 <sup>2</sup>       |
| JP6765 | 80 $\alpha$ $\Delta$ ORF15 | ORF15 80 $\alpha$ | +                      | 5.5 x 10 <sup>4</sup>       |
| JP6765 | 80 $\alpha$ $\Delta$ ORF15 | ORF15 80 $\alpha$ | +++ <sup>a</sup>       | 2.7 x 10 <sup>6</sup>       |
| JP6766 | 80 $\alpha$ $\Delta$ ORF15 | ORF73 phi85       | +                      | 2.2 x 10 <sup>2</sup>       |
| JP6766 | 80 $\alpha$ $\Delta$ ORF15 | ORF73 phi85       | +++ <sup>a</sup>       | 8.3 x 10 <sup>5</sup>       |
| JP2131 | $\phi$ 11                  | -                 |                        | 50                          |
| JP6767 | $\phi$ 11                  | ORF15 80 $\alpha$ | +                      | 1.4 x 10 <sup>6</sup>       |
| JP6767 | $\phi$ 11                  | ORF15 80 $\alpha$ | +++ <sup>a</sup>       | 6.5 x 10 <sup>6</sup>       |
| JP6768 | $\phi$ 11                  | ORF73 phi85       | +                      | 6.1 x 10 <sup>2</sup>       |
| JP6768 | $\phi$ 11                  | ORF73 phi85       | +++ <sup>a</sup>       | 7.0 x 10 <sup>5</sup>       |

<sup>a</sup>+: basal induction (without CdCl<sub>2</sub>); +++: using 5  $\mu$ M CdCl<sub>2</sub> as inducer

<sup>b</sup>No. transductants x ml of induced culture, using RN4220 as recipient strain.

Supplementary Table 3 | dUTPase activity.

| Phage       | Protein <sup>a</sup> | Activity <sup>b</sup> |
|-------------|----------------------|-----------------------|
| $\phi$ 11   | wt                   | 0.057                 |
| $\phi$ 11   | D81A                 | 0                     |
| 80 $\alpha$ | wt                   | 0.033                 |
| 80 $\alpha$ | D95E                 | 0.024                 |
| PH15        | wt                   | 0.044                 |

<sup>a</sup>His(6)-Dut protein purified from JP4560 ( $\phi$ 11 WT), JP4559 ( $\phi$ 11 D81A), JP5359 (80 $\alpha$  WT), JP5358 (80 $\alpha$  D95E), JP5527 (PH15)

<sup>b</sup>Measured as  $\Delta$ OD<sub>360</sub>/min, using 0.1  $\mu$ g of purified protein. Variation was within  $\pm$ 5% in all cases.

Supplementary Table 4 | Strains and plasmids used in this study.

| Strains   | Description                                             | Reference  |
|-----------|---------------------------------------------------------|------------|
| RN4220    | Restriction-defective deriviate of RN450                | 16         |
| RN450     | NCTC8325 cured of $\phi$ 11, $\phi$ 12 and $\phi$ 13    | 17         |
| RN981     | RN450 <i>recA</i> -mutant                               | 18         |
| BL21(DE3) | <i>E. coli</i> expression strain                        | Stratagene |
| RN451     | RN450 $\phi$ 11                                         | 17         |
| RN10359   | RN450 80 $\alpha$                                       | 19         |
| JP4025    | RN451 $\Delta$ <i>dut</i>                               | This work  |
| JP6032    | RN10359 $\Delta$ <i>dut</i>                             | This work  |
| JP6022    | RN10359 $\Delta$ <i>sri</i>                             | This work  |
| JP6015    | RN10359 $\Delta$ ORF15                                  | This work  |
| JP1794    | RN451 SaPIbov1 <i>tst::tetM</i>                         | This work  |
| JP2131    | RN451 SaPIbov2 <i>bap::tetM</i>                         | 20         |
| JP4125    | RN451 $\Delta$ <i>dut</i> SaPIbov1 <i>tst::tetM</i>     | This work  |
| JP3603    | RN10359 SaPIbov1 <i>tst::tetM</i>                       | This work  |
| JP6132    | RN10359 $\Delta$ <i>dut</i> SaPIbov1 <i>tst::tetM</i>   | This work  |
| JP6879    | JP6132 pJP685                                           | This work  |
| JP6881    | JP6132 pJP919                                           | This work  |
| JP6122    | RN10359 $\Delta$ <i>sri</i> SaPIbov1 <i>tst::tetM</i>   | This work  |
| JP6115    | RN10359 $\Delta$ ORF15 SaPIbov1 <i>tst::tetM</i>        | This work  |
| JP6764    | RN10359 SaPIbov2 <i>bap::tetM</i>                       | This work  |
| JP6232    | RN10359 $\Delta$ <i>dut</i> SaPIbov2 <i>bap::tetM</i>   | This work  |
| JP6222    | RN10359 $\Delta$ <i>sri</i> SaPIbov2 <i>bap::tetM</i>   | This work  |
| JP6215    | RN10359 $\Delta$ ORF15 SaPIbov2 <i>bap::tetM</i>        | This work  |
| JP3602    | RN10359 SaPI1 <i>tst::tetM</i>                          | This work  |
| JP6332    | RN10359 $\Delta$ <i>dut</i> SaPI1 <i>tst::tetM</i>      | This work  |
| JP6322    | RN10359 $\Delta$ <i>sri</i> SaPI1 <i>tst::tetM</i>      | This work  |
| JP6315    | RN10359 $\Delta$ ORF15 SaPI1 <i>tst::tetM</i>           | This work  |
| JP6772    | RN4220 SaPIbov1 <i>tst::tetM</i> $\Delta$ <i>stI</i>    | This work  |
| JP6773    | RN981 SaPIbov1 <i>tst::tetM</i> pJP813                  | This work  |
| JP5468    | RN4220 pJP674 pJP653                                    | This work  |
| JP5469    | RN4220 pJP674 pJP658                                    | This work  |
| JP6765    | RN10359 $\Delta$ ORF15 SaPIbov2 <i>bap::tetM</i> pJP751 | This work  |
| JP6766    | RN10359 $\Delta$ ORF15 SaPIbov2 <i>bap::tetM</i> pJP752 | This work  |
| JP6767    | RN451 SaPIbov2 <i>bap::tetM</i> pJP751                  | This work  |
| JP6768    | RN451 SaPIbov2 <i>bap::tetM</i> pJP752                  | This work  |
| JP6287    | RN4220 SaPIbov2 <i>bap::tetM</i> pJP751                 | This work  |
| JP6294    | RN4220 SaPIbov2 <i>bap::tetM</i> pCN51 (empty)          | This work  |
| JP6760    | BL21(DE3) pJP756                                        | This work  |
| JP6761    | BL21(DE3) pJP757                                        | This work  |

| Strains | Description                                                      | Reference |
|---------|------------------------------------------------------------------|-----------|
| JP6763  | BL21(DE3) pJP758                                                 | This work |
| JP4560  | BL21(DE3) pJP666                                                 | This work |
| JP4559  | BL21(DE3) pJP667                                                 | This work |
| JP5357  | BL21(DE3) pJP755                                                 | This work |
| JP5359  | BL21(DE3) pJP753                                                 | This work |
| JP6762  | BL21(DE3) pJP811                                                 | This work |
| JP5358  | BL21(DE3) pJP754                                                 | This work |
| JP5527  | BL21(DE3) pJP675                                                 | This work |
| JP6774  | RN4220 $\Delta$ <i>spa</i> SaPI <sub>bov1</sub> <i>tst::tetM</i> | This work |
| JP6789  | JP6774 pJP813                                                    | This work |
| JP6790  | JP6774 pJP814                                                    | This work |
| JP6791  | JP6774 pJP815                                                    | This work |
| JP6793  | JP6774 pJP817                                                    | This work |
| JP6794  | JP6774 pJP818                                                    | This work |
| JP6795  | JP6774 pJP819                                                    | This work |
| JP6796  | JP6774 pJP820                                                    | This work |
| JP6797  | JP6774 pJP821                                                    | This work |
| JP6798  | JP6774 pJP822                                                    | This work |
| JP6799  | JP6774 pJP823                                                    | This work |
| JP6800  | JP6774 pJP824                                                    | This work |
| JP5332  | JP4125 pJP661                                                    | This work |
| JP5333  | JP4125 pJP766                                                    | This work |
| JP6833  | JP4125 pJP813                                                    | This work |
| JP6834  | JP4125 pJP814                                                    | This work |
| JP6835  | JP4125 pJP815                                                    | This work |
| JP6836  | JP4125 pJP817                                                    | This work |
| JP6837  | JP4125 pJP818                                                    | This work |
| JP6838  | JP4125 pJP819                                                    | This work |
| JP6839  | JP4125 pJP820                                                    | This work |
| JP6840  | JP4125 pJP821                                                    | This work |
| JP6841  | JP4125 pJP822                                                    | This work |
| JP6842  | JP4125 pJP823                                                    | This work |
| JP6843  | JP4125 pJP824                                                    | This work |

| Plasmids   | Description                                                  | Reference  |
|------------|--------------------------------------------------------------|------------|
| pMAD       | Vector for efficient allelic replacement                     | 15         |
| pCN51      | Expression vector                                            | 9          |
| pET28a     | Expression vector                                            | Novagen    |
| pPROEX HTa | Expression vector                                            | Invitrogen |
| pRN8298    | Expression vector                                            | 9          |
| pJP759     | pMAD – $\Delta dut \phi 11$                                  | This work  |
| pJP760     | pMAD – $\Delta dut 80\alpha$                                 | This work  |
| pJP762     | pMAD – $\Delta sri 80\alpha$                                 | This work  |
| pJP763     | pMAD – $\Delta Orf15 80\alpha$                               | This work  |
| pJP653     | pCN51 – $dut \phi 11$                                        | This work  |
| pJP658     | pCN51 – $dut PH15$                                           | This work  |
| pJP751     | pCN51 – Orf15 80 $\alpha$                                    | This work  |
| pJP752     | pCN51 – Orf73 $\phi 85$                                      | This work  |
| pJP766     | pCN51- $dut \phi 11 \Delta$ central region                   | This work  |
| pJP661     | pCN51- $dut PH15$ central region $\phi 11$                   | This work  |
| pJP919     | pCN51- $dut 80\alpha$                                        | This work  |
| pJP685     | pCN51- $dut 80\alpha D95E$                                   | This work  |
| pJP666     | pET28a – $dut \phi 11$                                       | This work  |
| pJP667     | pET28a – $dut_{D81A} \phi 11$                                | This work  |
| pJP753     | pET28a – $dut 80\alpha$                                      | This work  |
| pJP754     | pET28a - $dut_{D95E} 80\alpha$                               | This work  |
| pJP755     | pET28a – $dut \phi 11 \Delta$ central region                 | This work  |
| pJP675     | pET28a – $dut PH15$                                          | This work  |
| pJP756     | pPROEX HTa - His-Stl <sub>SaPIbov1</sub> + $dut \phi 11$     | This work  |
| pJP757     | pPROEX HTa - His-Stl <sub>SaPIbov1</sub> + $dut \phi PH15$   | This work  |
| pJP758     | pPROEX HTa - His-Orf15 + Stl <sub>SaPIbov2</sub>             | This work  |
| pJP811     | pPROEX HTa - $dut \phi 11$                                   | This work  |
| pJP674     | pRN8298-clor-pInt-20-19-18blaZ                               | This work  |
| pJP813     | pCN51-3xflag- $dut \phi 11$                                  | This work  |
| pJP814     | pCN51-3xflag- $dut \phi 11 D81A$                             | This work  |
| pJP815     | pCN51-3xflag- $dut \phi PH15$                                | This work  |
| pJP817     | pCN51-3xflag- $dut 80\alpha K8R$                             | This work  |
| pJP818     | pCN51-3xflag- $dut 80\alpha K8R, K12E$                       | This work  |
| pJP819     | pCN51-3xflag- $dut \phi 11 R8K, E12K$                        | This work  |
| pJP820     | pCN51-3xflag- $dut \phi 11$ frameshift 3 <sup>rd</sup> codon | This work  |
| pJP821     | pCN51-3xflag- $dut 80\alpha$                                 | This work  |
| pJP822     | pCN51-3xflag- $dut \phi 11 R8K$                              | This work  |
| pJP823     | pCN51-3xflag- $dut \phi 11 E12K$                             | This work  |
| pJP824     | pCN51-3xflag- $dut 80\alpha K12E$                            | This work  |

Supplementary Table 5 | Oligonucleotides used in this study.

| Plasmid | Oligonucleotides           | Sequence (5'-3')                                                           |
|---------|----------------------------|----------------------------------------------------------------------------|
| pJP653  | Orf25phi11-4mS             | ACGTGTCGACGAAATTGAGAATAGCGTTTGC                                            |
|         | Orf25phi11-5cB             | CGCGGATCCCTTGACTCGATCTAAGATGTC                                             |
| pJP658  | PH15-1mB                   | CGCGGATCCGAGAATAGCGTTTGTACAGCTAGGGAGGA<br>GCAGGAAAATGACTAAAGAACTAGAAATTTAA |
|         | PH15-4cE                   | CCGGAATTCGTATTCTTTTAATCTCTGCTAC                                            |
| pJP666  | Orf25phi11-8mB             | CGCGGATCCATGACTAACACATTACAAGTAAGG                                          |
|         | Orf25phi11-9cS             | ACGCGTCCGACTTTTACACTCCGCTACTTCCG                                           |
| pJP667  | Orf25phi11-8mB             | CGCGGATCCATGACTAACACATTACAAGTAAGG                                          |
|         | Orf25phi11-6m              | GAAACAGGCAAGATAGCTGCAGGATATCACGGC                                          |
|         | Orf25phi11-7c              | GCCGTGATATCCTGCAGCTATCTTGCCTGTTTC                                          |
|         | Orf25phi11-9cS             | ACGCGTCCGACTTTTACACTCCGCTACTTCCG                                           |
| pJP675  | PH15-19mB                  | CGCGGATCCATGACTAAAGAACTAGAAATTTAA                                          |
|         | PH15-4cE                   | CCGGAATTCGTATTCTTTTAATCTCTGCTAC                                            |
| pJP751  | Orf15-80 $\alpha$ -7mB     | CGCGGATCCTAATTAACCTTAGTCATGAGATGG                                          |
| pJP752  | Orf15-80 $\alpha$ -8cK     | CGGGGTACCTTCAGTCATGTTCTACCTCC                                              |
| pJP753  | Orf32phi80 $\alpha$ -12mB  | CGCGGATCCATGACTAACACATTACAAGTAAAC                                          |
| pJP754  | Orf32phi80 $\alpha$ -13cS  | ACGCGTCCGACTCTTTTACACTCCGCTACTTCC                                          |
| pJP755  | Orf25phi11-8mB             | CGCGGATCCATGACTAACACATTACAAGTAAGG                                          |
|         | Orf25phi11-23c             | TTTTTCTACTGTAATATCTTTATCACCTATATTATCTGTGAT<br>AATCCCTAAATTGCCGTGATATCC     |
|         | Orf25phi11-24m             | ATCACAGATAATATAGGTGATAAAGATATTACAGTAGAAAA<br>AGGAGACAAACTAGCTCAATTGGTT     |
|         | Orf25phi11-9cS             | ACGCGTCCGACTTTTACACTCCGCTACTTCCG                                           |
| pJP756  | Orf25phi11-25mK            | CGGGGTACCTTCACACAGGAAACAGACCATGACTAACAC<br>ATTACAAGTAAGG                   |
|         | Orf25phi11-26cH            | CCCAAGCTTCTTGACTCGATCTAAGATGTC                                             |
|         | SaPIbov1-162mB             | CGCGGATCCGATGGAAGGAGCTGGTCAAATGGC                                          |
|         | SaPIbov1-150cK             | CGGGGTACCGATTAATTAGTGTCTTTTTCAAG                                           |
| pJP757  | PH15-8mK                   | CGGGGTACCTTCACACAGGAAACAGACCATGACTAAAGA<br>ACTAGAAATTTAA                   |
|         | PH15-9cH                   | CCCAAGCTTGTATTCTTTTAATCTCTGCTAC                                            |
|         | SaPIbov1-162mB             | CGCGGATCCGATGGAAGGAGCTGGTCAAATGGC                                          |
|         | SaPIbov1-150cK             | CGGGGTACCGATTAATTAGTGTCTTTTTCAAG                                           |
| pJP758  | Orf15-phi80 $\alpha$ -12mB | CGCGGATCCGATGAAGCAGACTGTAACCTTATC                                          |
|         | Orf15phi80 $\alpha$ -6cP   | AACTGCAGTTCAGTCATGTTCTACCTCC                                               |
|         | SaPIbov2-orf22-5mP         | AACTGCAGAATTCACACAGGAAACAGACCATGATTTTATG<br>TACATTAATAAATTATATG            |
|         | SaPIbov2-orf22-6cH         | CCCAAGCTTAAATAGTATGTATGAACTCTTAAG                                          |

| Plasmid | Oligonucleotides        | Sequence (5'-3')                                                                                      |
|---------|-------------------------|-------------------------------------------------------------------------------------------------------|
| pJP759  | Orf-24- $\phi$ 11-1mB   | CGCGGATCCTCAGGATAACGAACGAGTGCC                                                                        |
|         | Orf25- $\phi$ 11-1c     | TTCTGATAATAGCCTTACTTG                                                                                 |
|         | Orf25- $\phi$ 11-2m     | CAAGTAAGGCTATTATCAGAATCAGAACGTGGAGAAAAAGGC                                                            |
|         | Orf25- $\phi$ 11-3cE    | CGGGAATTCCTTTAACCACCACTAAACACCC                                                                       |
| pJP760  | Orf32-80 $\alpha$ -3mB  | CGCGGATCCATCGAGTTTAAAGAAGGAGCC                                                                        |
|         | Orf32-80 $\alpha$ -4c   | CGTCTTATGATTTTCGTTCCGGG                                                                               |
|         | Orf32-80 $\alpha$ -5m   | CCCGAACGAAATCATAAGACGCCTGAACTAAAGCAAGTGGAG                                                            |
|         | Orf32-80 $\alpha$ -6cS  | ACGCGTTCGACGCATCATTCTTAACATAGCCC                                                                      |
| pJP762  | Orf22-80 $\alpha$ -1mB  | CGCGGATCCAGCAATAGAGTACGTACAAGG                                                                        |
|         | Orf22-80 $\alpha$ -2c   | GTACATATCTGAACACTCAAG                                                                                 |
|         | Orf22-80 $\alpha$ -3m   | CTTGAGTGTTTTCAGATATGTACCTTGCAGAACGTACACACAG                                                           |
|         | Orf21-80 $\alpha$ -4cE  | CGGGAATTCCTCGACCATGATTTAAGTAATGG                                                                      |
| pJP763  | Orf15-80 $\alpha$ -1mB  | CGCGGATCCTTATCACCTCCTTTCACTAGG                                                                        |
|         | Orf15-80 $\alpha$ -2c   | TACAGTCTGCTTCATAGTGAC                                                                                 |
|         | Orf15-80 $\alpha$ -3m   | GTCATATGAAGCAGACTGTAATGTCTAAGCACAAAGCAATC                                                             |
|         | Orf15-80 $\alpha$ -4cE  | CGGGAATTCATTGTTTCTCCTCACTATCC                                                                         |
| pJP766  | Orf25- $\phi$ 11-4mS    | ACGTGTCGACGAAATTGAGAATAGCGTTTGC                                                                       |
|         | Orf25- $\phi$ 11-23c    | TTTTTCTACTGTAATATCTTTATCACCTATATTATCTGTGATAAT<br>CCCTAAATTGCCGTGATATCC                                |
|         | Orf25- $\phi$ 11-24m    | ATCACAGATAATATAGGTGATAAAGATATTACAGTAGAAAAAG<br>GAGACAACTAGCTCAATTGGTT                                 |
|         | Orf25- $\phi$ 11-5cB    | CGCGGATCCCTTGACTCGATCTAAGATGTC                                                                        |
| pJP661  | PH15-1mB                | CGCGGATCCGAGAATAGCGTTTGCTACAGCTAGGGAGGAGC<br>AGGAAAATGACTAAAGAAGCTAGAAATTTAA                          |
|         | PH15-2c                 | TGCAATAGCGTCATTCTTGATATTAATACCGATTTCTTTATTGT<br>ATG                                                   |
|         | Orf25- $\phi$ 11-22m    | AATATCAAGAATGACGCTATTGCA                                                                              |
|         | PH15-4cE                | CGGGAATTCGTATTCTTTAATCTCTGCTAC                                                                        |
| pJP674  | SaPIbov1-149cB          | CGCGGATCCGATCAGTACCTAAATATGCG                                                                         |
|         | NY-24mK                 | CGGGGTACCCACTCGGTTATAACCTT                                                                            |
| pJP813  | Orf25- $\phi$ 11-35m    | ATGGATTATAAAGATCACGATGGCGATTATAAAGATCACGATA<br>TCGATTATAAAGATGATGATGATAAAATGACTAACACATTACA<br>AGTAAGG |
|         | Orf25- $\phi$ 11-5cB    | CGCGGATCCCTTGACTCGATCTAAGATGTC                                                                        |
|         | Orf32-80 $\alpha$ -18mS | ACGCGTTCGACATTATGGCAGGTCAAGTTGTCTATAAATATGA<br>GGAGGAATAGGAAAATGGATTATAAAGATCACGATGG                  |
| pJP814  | Orf25- $\phi$ 11-35m    | ATGGATTATAAAGATCACGATGGCGATTATAAAGATCACGATA<br>TCGATTATAAAGATGATGATGATAAAATGACTAACACATTACA<br>AGTAAGG |
|         | Orf25- $\phi$ 11-5cB    | CGCGGATCCCTTGACTCGATCTAAGATGTC                                                                        |
|         | Orf32-80 $\alpha$ -18mS | ACGCGTTCGACATTATGGCAGGTCAAGTTGTCTATAAATATGA<br>GGAGGAATAGGAAAATGGATTATAAAGATCACGATGG                  |

| Plasmid | Oligonucleotides        | Sequence (5'-3')                                                                                                |
|---------|-------------------------|-----------------------------------------------------------------------------------------------------------------|
| pJP815  | PH15-10m                | ATGGATTATAAAGATCACGATGGCGATTATAAAGATCACG<br>ATATCGATTATAAAGATGATGATGATAAAATGACTAAAGAA<br>CTAGAAATTA             |
|         | PH15-11cB               | CGCGGATCCGTATTCTTTAATCTCTGCTAC                                                                                  |
|         | Orf32-80 $\alpha$ -18mS | ACGCGTCCGACATTATGGCAGGTCAAGTTGTCTATAAATAT<br>GAGGAGGAATAGGAAAATGGATTATAAAGATCACGATGG                            |
| pJP817  | Orf32-80 $\alpha$ -24m  | GATGGCGATTATAAAGATCACGATATCGATTATAAAGATG<br>ATGATGATAAAATGACTAACACATTACAAGTAAGGCTATTA<br>TCAAAAATGCTAGAATGC     |
|         | Orf32-80 $\alpha$ -2cB  | CGCGGATCCCTCACCAAACCTCCTTGACTC                                                                                  |
|         | Orf32-80 $\alpha$ -23mS | ACGCGTCCGACATTATGGCAGGTCAAGTTGTCTATAAATAT<br>GAGGAGGAATAGGAAAATGGATTATAAAGATCAC<br>GATGGCGATTATAAAGATCACG       |
| pJP818  | Orf32-80 $\alpha$ -22m  | GATGGCGATTATAAAGATCACGATATCGATTATAAAGATG<br>ATGATGATAAAATGACTAACACATTACAAGTAAGGCTATTA<br>TCAGAAAATGCTAGAATGC    |
|         | Orf32-80 $\alpha$ -2cB  | CGCGGATCCCTCACCAAACCTCCTTGACTC                                                                                  |
|         | Orf32-80 $\alpha$ -23mS | ACGCGTCCGACATTATGGCAGGTCAAGTTGTCTATAAATAT<br>GAGGAGGAATAGGAAAATGGATTATAAAGATCACGATGGC<br>GATTATAAAGATCACG       |
| pJP819  | Orf25- $\phi$ 11-43m    | GATGGCGATTATAAAGATCACGATATCGATTATAAAGATG<br>ATGATGATAAAATGACTAACACATTACAAGTAAACTATTA<br>TCAAAAATGCTAGAATGC      |
|         | Orf25- $\phi$ 11-5cB    | CGCGGATCCCTTGACTCGATCTAAGATGTC                                                                                  |
|         | Orf32-80 $\alpha$ -23mS | ACGCGTCCGACATTATGGCAGGTCAAGTTGTCTATAAATAT<br>GAGGAGGAATAGGAAAATGGATTATAAAGATCACGATGGC<br>GATTATAAAGATCACG       |
| pJP820  | Orf25- $\phi$ 11-49m    | ATGGATTATAAAGATCACGATGGCGATTATAAAGATCACG<br>ATATCGATTATAAAGATGATGATGATAAAATGACTACACAT<br>TACAAGTAAGG            |
|         | Orf25- $\phi$ 11-5cB    | CGCGGATCCCTTGACTCGATCTAAGATGTC                                                                                  |
|         | Orf32-80 $\alpha$ -18mS | ACGCGTCCGACATTATGGCAGGTCAAGTTGTCTATAAATAT<br>GAGGAGGAATAGGAAAATGGATTATAAAGATCACGATGG                            |
| pJP821  | Orf32-80 $\alpha$ -17m  | ATGGATTATAAAGATCACGATGGCGATTATAAAGATCACG<br>ATATCGATTATAAAGATGATGATGATAAAATGACTAACACA<br>TTACAAGTAAAC           |
|         | Orf32-80 $\alpha$ -2cB  | CGCGGATCCCTCACCAAACCTCCTTGACTC                                                                                  |
|         | Orf32-80 $\alpha$ -18mS | ACGCGTCCGACATTATGGCAGGTCAAGTTGTCTATAAATAT<br>GAGGAGGAATAGGAAAATGGATTATAAAGATCACGATGG                            |
| pJP822  | Orf25- $\phi$ 11-44m    | GATGGCGATTATAAAGATCACGATATCGATTATAAAGATG<br>ATGATGATAAA<br>ATGACTAACACATTACAAGTAAACTATTATCAGAAAATGC<br>TAGAATGC |
|         | Orf25- $\phi$ 11-5cB    | CGCGGATCCCTTGACTCGATCTAAGATGTC                                                                                  |
|         | Orf32-80 $\alpha$ -23mS | ACGCGTCCGACATTATGGCAGGTCAAGTTGTCTATAAATAT<br>GAGGAGGAATAGGAAAATGGATTATAAAGATCACGATGG<br>CGATTATAAAGATCACG       |



| Plasmid                    | Oligonucleotides        | Sequence (5'-3')                                                                                                  |
|----------------------------|-------------------------|-------------------------------------------------------------------------------------------------------------------|
| pJP823                     | Orf25- $\phi$ 11-45m    | GATGGCGATTATAAAGATCACGATATCGATTATAAAGAT<br>GATGATGATAAAATGACTAACACATTACAAGTAAGGCTA<br>TTATCAAAAAATGCTAGAATGC      |
|                            | Orf25- $\phi$ 11-5cB    | CGCGGATCCCTTGACTCGATCTAAGATGTC                                                                                    |
|                            | Orf32-80 $\alpha$ -23mS | ACGCGT <u>CGAC</u> ATTATGGCAGGTCAAGTTGTCTATAAATA<br>TGAGGAGGAATAGGAAAATGGATTATAAAGATCAC<br>GATGGCGATTATAAAGATCACG |
| pJP824                     | Orf32-80 $\alpha$ -25m  | GATGGCGATTATAAAGATCACGATATCGATTATAAAGAT<br>GATGATGATAAAATGACTAACACATTACAAGTAAACTAT<br>TATCAGAAAATGCTAGAATGC       |
|                            | Orf32-80 $\alpha$ -2cB  | CGCGGATCCTCACCAAAACCTCCTTGACTC                                                                                    |
|                            | Orf32-80 $\alpha$ -23mS | ACGCGT <u>CGAC</u> ATTATGGCAGGTCAAGTTGTCTATAAATA<br>TGAGGAGGAATAGGAAAATGGATTATAAAGATCAC<br>GATGGCGATTATAAAGATCACG |
| Probe                      | Oligonucleotides        | Sequence (5'-3')                                                                                                  |
| <b>EMSA</b>                | 19-20upbov2             | ATTTCAACATTAAACATTGC                                                                                              |
|                            | 19-20dwbov              | TAAATCCTGTCCTTTCAC                                                                                                |
| <b>SaPIbov1</b>            | SaPIbov1-112mE          | CCGGA <u>ATTCA</u> ATTGCTGAGGCAAACTTC                                                                             |
|                            | SaPIbov1-113cB          | CGCGGATCC <u>TA</u> ATTCTCCACGTCTAAAGC                                                                            |
| <b>SaPIbov2</b>            | Sip-16mB                | CGCGGATCCCAATCCAATCAAACGCATGCG                                                                                    |
|                            | Sip-10cE                | CCGGA <u>ATTCT</u> TTTCAATGACTCTGTACGTT                                                                           |
| <b><math>\phi</math>11</b> | Orf-24- $\phi$ 11-1mB   | CGCGGATCC <u>TC</u> AGGATAACGAACGAGTGCC                                                                           |
|                            | Orf25- $\phi$ 11-1c     | TTCTGATAATAGCCTTACTTG                                                                                             |

Sequences recognized by the restriction enzymes used in cloning are underlined.

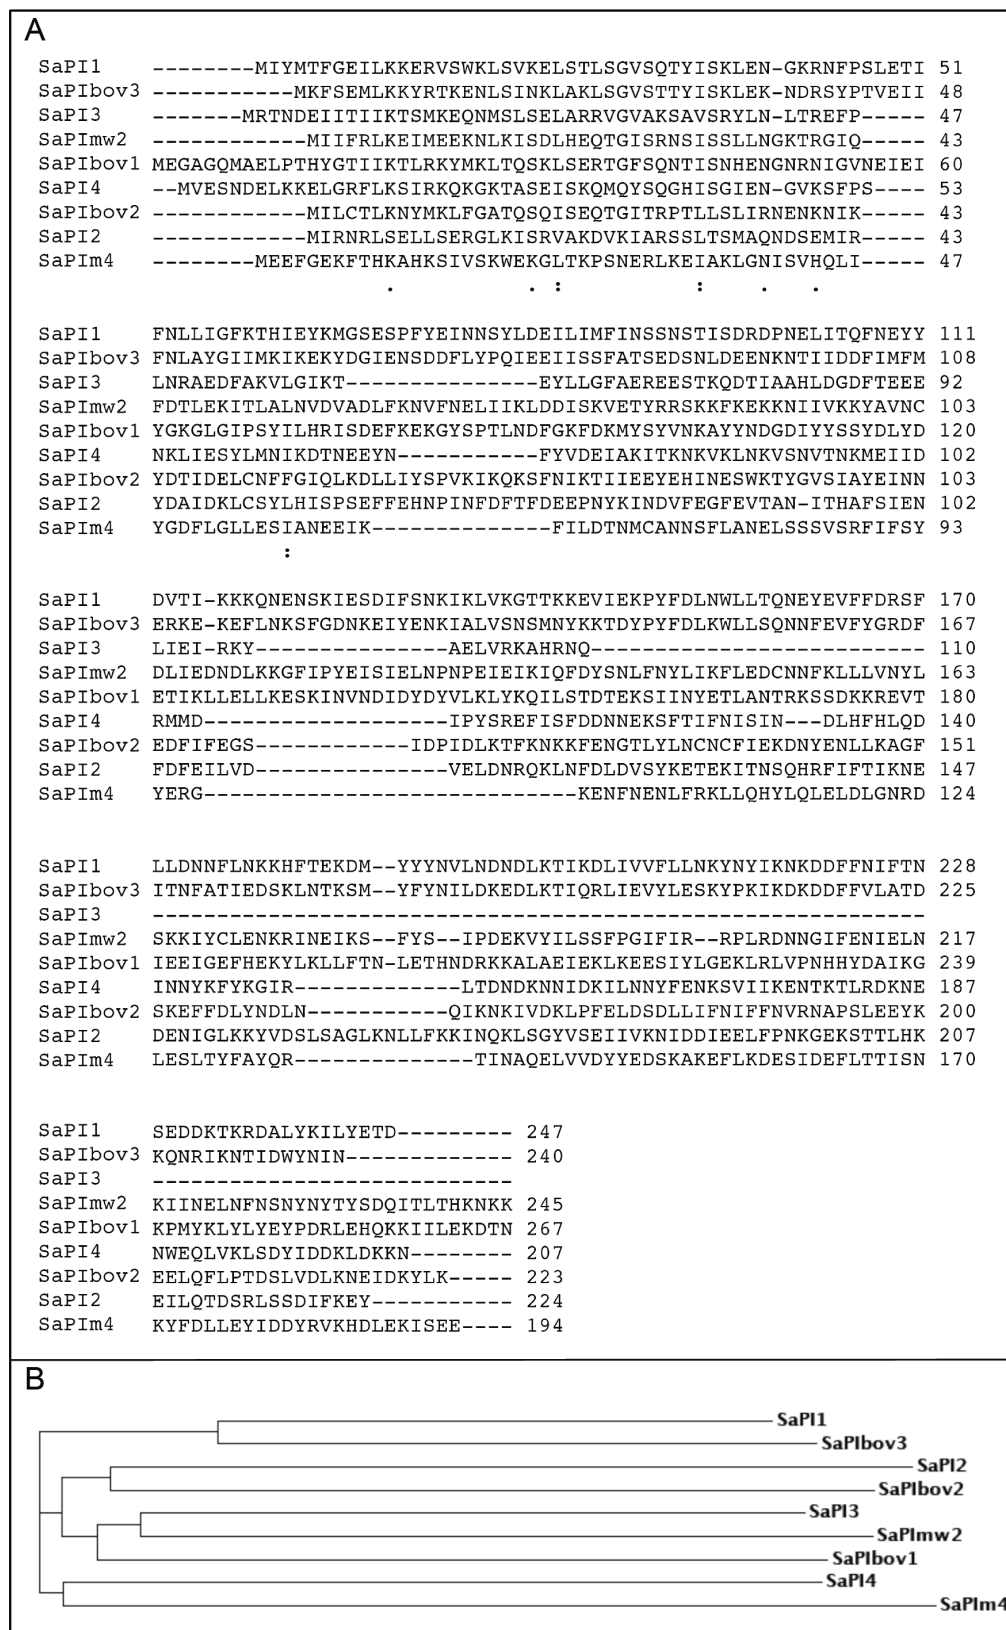

Supplementary Figure 1 | SaPI StI sequence comparison.

Sequence alignment (A) and nearest neighbor tree (B) generated by ClustalW.

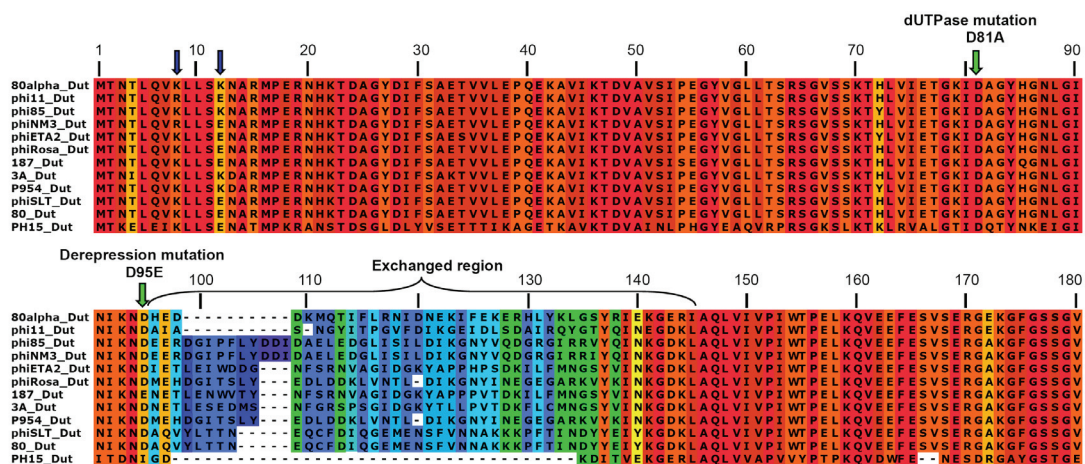

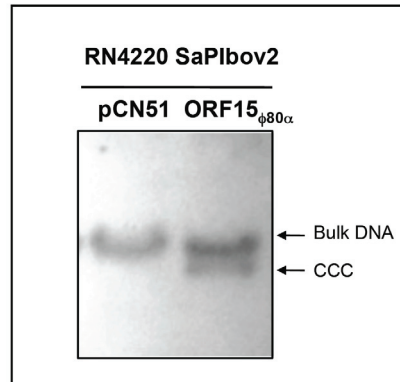

**Supplementary Figure 3 | De-repression of SaPIbov2 replication by cloned ORF15.**

Southern blot of lysates from a non-lysogenic derivative of RN4220 carrying SaPIbov2 and either vector alone (pCN51, lane 1; strain JP6294) or plasmid expressing ORF15<sub>φ80α</sub> (lane 2; strain JP6287). Cultures were grown until OD<sub>540</sub>=0.3 and 1 ml samples were collected and used to prepare standard minilysates, which were resolved on a 0.7% agarose gel, Southern blotted, and probed for SaPIbov2 *int*. CCC, covalently closed circular SaPIbov2, which migrates near to the bulk DNA as a consequence of its relatively large size (~28 kb).

```

ORF15  MKQTVTYLIKHKDENLFITNRPTEVNDTVKYSTDMDRAREFDGLDKTVIDMSKHKAIKKT 60
ORF73  MNQTVTYLIRHRDMPYITNKPTDNNSDVSYSTNRNRAREFNGMEEASINMDYHKAIKKT 60
      *:*:*:*:*:*:*:*  ::*:*:*:*: * . *.***: . *****:~::~: *:* . *****

ORF15  VTETIEYEEVEHD 73
ORF73  VTETIEYEEVEHD 73
      *****

```

**Supplementary Figure 4 | Comparison of two SaPI<sub>bov2</sub> inducer proteins:  $\phi 80\alpha$**

**ORF15 and  $\phi 85$  ORF73.**

## References

- <sup>16</sup> Kreiswirth, B.N. *et al.*, The toxic shock syndrome exotoxin structural gene is not detectably transmitted by a prophage. *Nature* 305 (5936), 709-712 (1983).
- <sup>17</sup> Novick, R., Properties of a cryptic high-frequency transducing phage in *Staphylococcus aureus*. *Virology* 33 (1), 155-166 (1967).
- <sup>18</sup> Wyman, L., Goering, R.V., & Novick, R.P., Genetic control of chromosomal and plasmid recombination in *Staphylococcus aureus*. *Genetics* 76 (4), 681-702 (1974).
- <sup>19</sup> Ubeda, C., Barry, P., Penades, J.R., & Novick, R.P., A pathogenicity island replicon in *Staphylococcus aureus* replicates as an unstable plasmid. *Proc Natl Acad Sci U S A* 104 (36), 14182-14188 (2007).
- <sup>20</sup> Maiques, E. *et al.*, Role of staphylococcal phage and SaPI integrase in intra- and interspecies SaPI transfer. *J Bacteriol* 189 (15), 5608-5616 (2007).
- <sup>21</sup> Simossis, V.A., Kleinjung, J., & Heringa, J., Homology-extended sequence alignment. *Nucleic Acids Res* 33 (3), 816-824 (2005).
